# Supplementary material
Source: PubMed Central journal article supplement (PMC2048715)

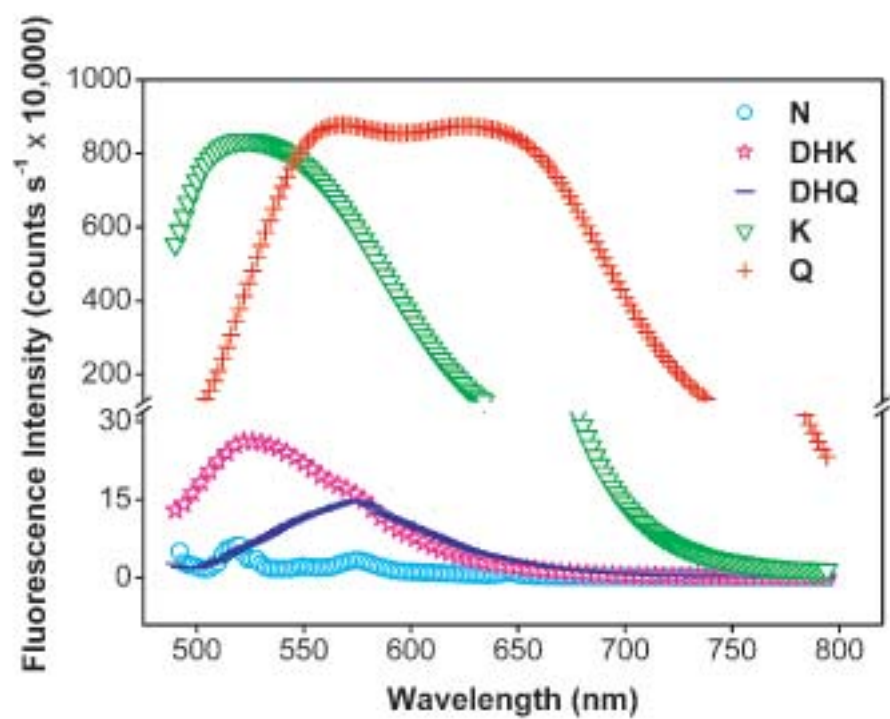

Supplement: plntphys_pp.107.101824_1.pdf [file plntphys_pp.107.101824_1.pdf]

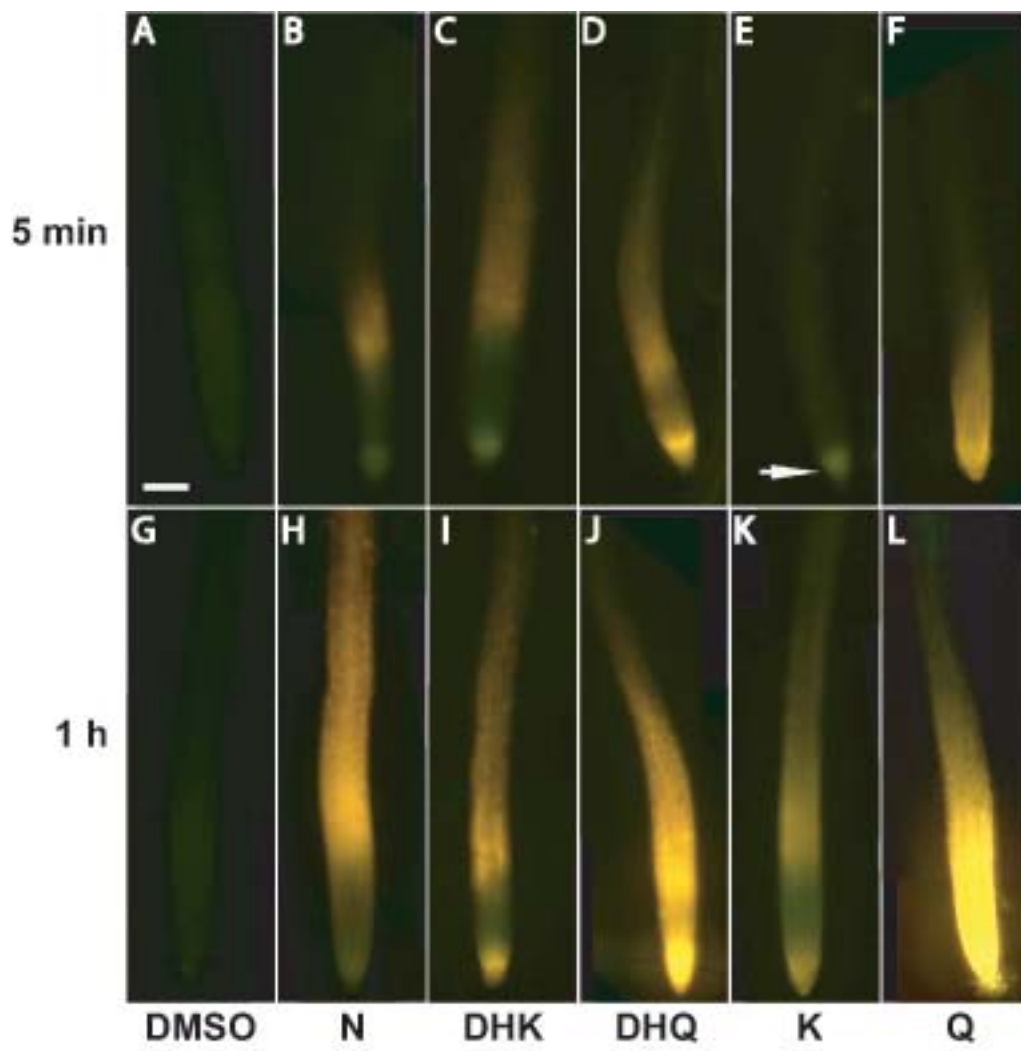

Supplement: plntphys_pp.107.101824_2.pdf [file plntphys_pp.107.101824_2.pdf]

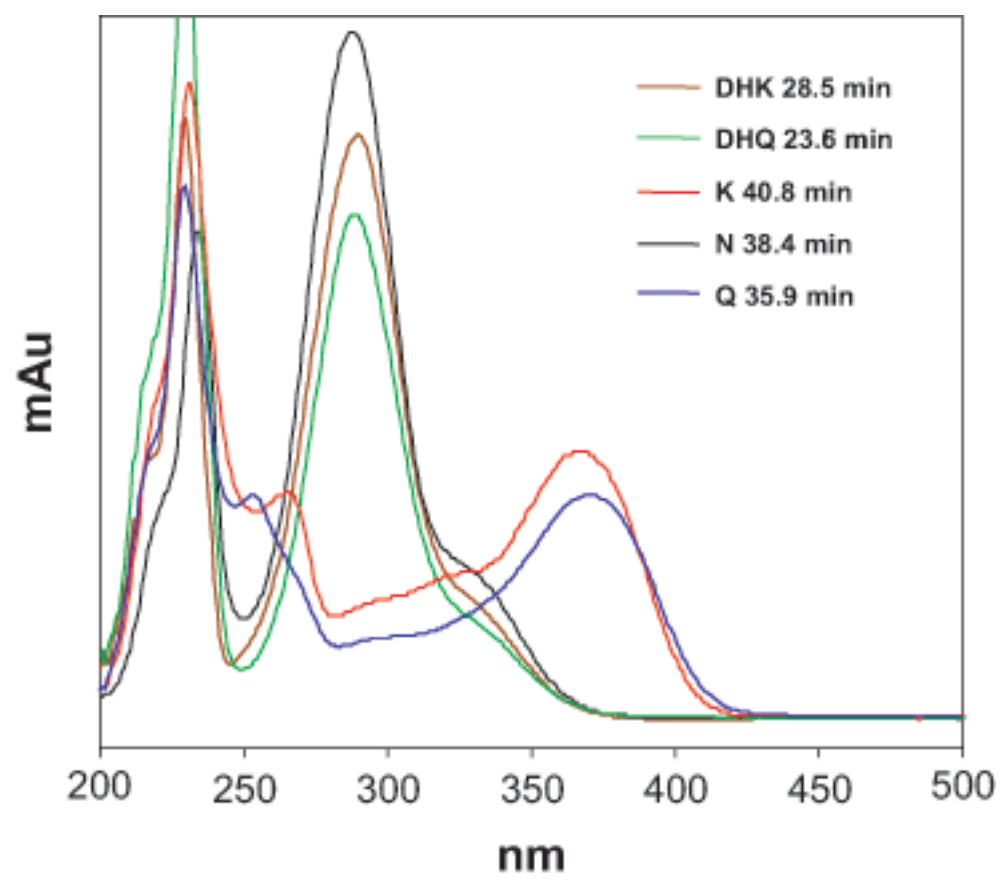

Supplement: plntphys_pp.107.101824_3.pdf [file plntphys_pp.107.101824_3.pdf]
